# Supplementary material
Source: PubMed Central journal article supplement (PMC3726964)
Supplement: ijcep0006-1493-f8.pdf [file ijcep0006-1493-f8.pdf]

RAF1-MEK1-ERK/AKT axis and NSCLC cell lines resistance to erlotinib

Supplementary data

Supplementary Table 1. Primers for qPCR validation

| gene   | forward                 | reverse                |
|--------|-------------------------|------------------------|
| Actb   | caccatgtaccctggcatt     | gtacttgcgctcaggaggag   |
| CCNT1  | ACAACAAACGGTGGTATTTCACT | CCTGCTGGCGATAAGAAAGTT  |
| CNNM4  | CAGGAGATTCGCACTGTTTACAA | GGGCTCCGTCACCTTCAAC    |
| CTNNA1 | AAGCGAAGATTGCGGAACA     | CATTTGGACACTTCAGCATCCA |
| CX3CL1 | CCATGAGTCCCCTGTTTGTTC   | TGCCTACAACCTCCCTTTCC   |
| CXCL16 | CAGAAGCAGCCGAAAAAAT     | GGACTGGCACTGTGGCTGAT   |
| CXCR4  | ACGCCACCAACAGTCAGAG     | AGTCGGGAATAGTCAGCAGGA  |
| EGFR   | TCTGCCGCAAATTCGAGAC     | GTGGGGTTGTAGAGCATGAGT  |
| EPHB4  | CCACCGGAAGGTGAATGTC     | CTGGGCGCACTTTTGTAGAA   |
| MYC    | GGCGAACACACAACGTCTTG    | TGGTCACGCAGGGCAA       |
| RAB3D  | CACCATCACACGGCCTACT     | CGGCAAAGGATCCTGATTG    |
| RET    | AAAGTGGCATTGGGCCTCTAC   | GCAGGGCATGGACGTACAG    |
| STK10  | TCAGGAGTCCCACCTTGCAT    | GCATTCCATTTCCCCTGAT    |
| TP53   | CAGCACATGACGGAGGTTGT    | TCATCCAATACTCCACACGC   |

Supplementary Table 2. Significantly expression-altered genes in Calu-6 compared to U1752

| Probe Set ID | Gene Symbol | Normalized difference | fold change | P value  |
|--------------|-------------|-----------------------|-------------|----------|
| 8151532      | FABP4       | 2.6974                | 6.486319    | 2.29E-03 |
| 8072626      | TIMP3       | 2.6526                | 6.287995    | 6.80E-04 |
| 8047467      | CDK15       | 2.4937                | 5.632206    | 3.55E-04 |
| 8108217      | TGFBI       | 2.4842                | 5.59524     | 4.46E-04 |
| 7954090      | EMP1        | 2.3863                | 5.228148    | 6.63E-04 |
| 7982597      | THBS1       | 2.2967                | 4.913326    | 3.31E-05 |
| 8120967      | NT5E        | 2.2249                | 4.674785    | 7.40E-06 |
| 7908388      | RGS1        | 2.2249                | 4.674785    | 8.63E-04 |
| 8058857      | IGFBP5      | 2.1317                | 4.382336    | 8.98E-04 |
| 8003667      | SERPINF1    | 2.1011                | 4.290364    | 1.37E-03 |
| 8021081      | SLC14A1     | 2.0958                | 4.274631    | 9.29E-04 |
| 8166611      | MAGEB2      | 2.0954                | 4.273446    | 7.97E-04 |
| 7948229      | SLC43A3     | 2.0428                | 4.120445    | 4.65E-05 |
| 8059905      | COL6A3      | 2.0232                | 4.064844    | 3.43E-03 |
| 8102950      | INPP4B      | 2.0215                | 4.060057    | 1.50E-03 |
| 7954196      | MGST1       | 2.0159                | 4.044328    | 9.41E-04 |
| 8081548      | PVRL3       | 2.013                 | 4.036207    | 1.07E-04 |
| 8109677      | GABRG2      | 1.992                 | 3.977881    | 8.99E-04 |
| 7962579      | AMIGO2      | 1.9752                | 3.931827    | 6.39E-04 |
| 8157524      | TLR4        | 1.9164                | 3.774799    | 7.73E-03 |
| 7914270      | LAPTM5      | 1.8676                | 3.64925     | 2.98E-04 |
| 8045664      | LYPD6B      | 1.8387                | 3.576876    | 4.12E-05 |
| 8138381      | AGR2        | 1.7371                | 3.333644    | 9.14E-03 |
| 8152512      | TNFRSF11B   | 1.7184                | 3.290713    | 1.10E-02 |
| 7974341      | GNG2        | 1.7124                | 3.277055    | 1.36E-03 |
| 8147000      | ZFH4        | 1.7074                | 3.265718    | 1.36E-03 |
| 8058765      | FN1         | 1.6959                | 3.239789    | 1.17E-04 |

RAF1-MEK1-ERK/AKT axis and NSCLC cell lines resistance to erlotinib

|         |              |        |          |          |
|---------|--------------|--------|----------|----------|
| 8140709 | KIAA1324L    | 1.6903 | 3.227238 | 3.18E-03 |
| 8140967 | SAMD9        | 1.6825 | 3.209837 | 2.02E-02 |
| 8129974 | FUCA2        | 1.6594 | 3.158851 | 6.26E-04 |
| 8040365 | TRIB2        | 1.6538 | 3.146614 | 6.82E-03 |
| 8113234 | PCSK1        | 1.6491 | 3.136379 | 2.31E-04 |
| 8152606 | SNTB1        | 1.6442 | 3.125745 | 4.46E-03 |
| 7983718 | SCG3         | 1.6375 | 3.111262 | 5.74E-03 |
| 7947230 | BDNF         | 1.636  | 3.108029 | 4.14E-03 |
| 7944351 | FOXR1        | 1.6266 | 3.087844 | 3.07E-04 |
| 8100109 | GABRA2       | 1.6191 | 3.071833 | 9.34E-06 |
| 8147030 | STMN2        | 1.6173 | 3.068003 | 1.03E-03 |
| 8077899 | PPARG        | 1.5784 | 2.986385 | 2.48E-05 |
| 8021169 | LIPG         | 1.5772 | 2.983902 | 6.94E-04 |
| 7972713 | EFNB2        | 1.5685 | 2.965962 | 1.36E-04 |
| 8104901 | IL7R         | 1.5617 | 2.952015 | 9.35E-03 |
| 8078350 | TGFBR2       | 1.553  | 2.934267 | 2.97E-03 |
| 8057506 | FRZB         | 1.5393 | 2.906534 | 5.08E-03 |
| 7955613 | KRT7         | 1.5239 | 2.875674 | 2.30E-02 |
| 8138745 | HOXA7        | 1.5042 | 2.836673 | 2.33E-02 |
| 8051573 | CDC42EP3     | 1.494  | 2.816688 | 6.65E-04 |
| 8095508 | AMTN         | 1.4848 | 2.798784 | 9.02E-03 |
| 8036710 | GMFG         | 1.4735 | 2.776948 | 3.70E-03 |
| 7972003 | KLF12        | 1.4689 | 2.768108 | 3.06E-05 |
| 8106660 | RASGRF2      | 1.4674 | 2.765231 | 9.85E-04 |
| 8018975 | LGALS3BP     | 1.4653 | 2.761209 | 1.39E-03 |
| 8089082 | DCBLD2       | 1.4594 | 2.74994  | 8.59E-04 |
| 8104663 | CDH6         | 1.452  | 2.735871 | 2.91E-04 |
| 7922976 | PTGS2        | 1.4476 | 2.727539 | 1.11E-03 |
| 7917912 | DPYD         | 1.4436 | 2.719987 | 2.71E-04 |
| 8066822 | SULF2        | 1.4386 | 2.710577 | 6.38E-04 |
| 7960362 | LOC100128816 | 1.4257 | 2.686448 | 1.61E-03 |
| 8106448 | PDE8B        | 1.4252 | 2.685517 | 4.69E-03 |
| 8068022 | MIR155       | 1.42   | 2.675855 | 4.54E-03 |
| 8080810 | PTPRG        | 1.4137 | 2.664196 | 2.98E-03 |
| 8115327 | SPARC        | 1.402  | 2.642677 | 2.24E-04 |
| 7957140 | LGR5         | 1.3987 | 2.636639 | 4.91E-03 |
| 8163637 | TNC          | 1.3952 | 2.63025  | 6.95E-04 |
| 8128991 | LAMA4        | 1.3901 | 2.620968 | 6.92E-03 |
| 8013753 | RAB34        | 1.3877 | 2.616612 | 7.58E-03 |
| 8078330 | RBMS3        | 1.3794 | 2.601602 | 3.76E-04 |
| 8150962 | TOX          | 1.375  | 2.593679 | 4.99E-03 |
| 7955441 | METTL7A      | 1.3749 | 2.593499 | 1.96E-03 |
| 7987145 | FMN1         | 1.37   | 2.584706 | 6.69E-03 |
| 7939932 | OR4C6        | 1.3451 | 2.540478 | 5.44E-04 |
| 8023415 | TCF4         | 1.3405 | 2.532391 | 9.23E-05 |
| 8139500 | TNS3         | 1.3394 | 2.530461 | 3.66E-04 |
| 8106743 | VCAN         | 1.3354 | 2.523454 | 1.82E-03 |
| 8049487 | MLPH         | 1.3335 | 2.520133 | 5.68E-04 |
| 7959856 | PIWIL1       | 1.3247 | 2.504808 | 5.61E-03 |

RAF1-MEK1-ERK/AKT axis and NSCLC cell lines resistance to erlotinib

|         |          |        |          |          |
|---------|----------|--------|----------|----------|
| 7962559 | SLC38A4  | 1.3179 | 2.49303  | 3.25E-03 |
| 8046078 | B3GALT1  | 1.3152 | 2.488368 | 4.46E-03 |
| 8111387 | ADAMTS12 | 1.3114 | 2.481823 | 1.25E-02 |
| 8140971 | SAMD9L   | 1.3078 | 2.475637 | 1.90E-03 |
| 8138749 | HOXA9    | 1.3063 | 2.473065 | 9.83E-04 |
| 8044212 | SULT1C2  | 1.2943 | 2.45258  | 8.81E-04 |
| 8047738 | NRP2     | 1.2886 | 2.442909 | 1.71E-03 |
| 8005171 | TRPV2    | 1.285  | 2.436821 | 4.82E-04 |
| 7909789 | TGFB2    | 1.2834 | 2.43412  | 1.37E-04 |
| 7902541 | IFI44L   | 1.2824 | 2.432433 | 1.51E-02 |
| 7967325 | HCAR1    | 1.2821 | 2.431927 | 1.87E-04 |
| 8175710 | CSAG3    | 1.2683 | 2.408776 | 3.30E-03 |
| 8081431 | ALCAM    | 1.2634 | 2.400608 | 3.18E-03 |
| 8103769 | HPGD     | 1.2591 | 2.393464 | 3.69E-04 |
| 7995681 | MMP2     | 1.2573 | 2.390479 | 2.59E-03 |
| 7944667 | SORL1    | 1.2561 | 2.388492 | 6.38E-04 |
| 8114938 | JAKMIP2  | 1.253  | 2.383365 | 2.56E-06 |
| 7986214 | SLCO3A1  | 1.2481 | 2.375284 | 2.00E-03 |
| 8148040 | MAL2     | 1.2412 | 2.363951 | 1.69E-03 |
| 8170576 | CSAG1    | 1.2332 | 2.350879 | 3.64E-03 |
| 8111234 | CDH12    | 1.2295 | 2.344857 | 1.39E-03 |
| 8150419 | ZMAT4    | 1.2287 | 2.343557 | 9.84E-04 |
| 7920291 | S100A16  | 1.2286 | 2.343395 | 4.51E-03 |
| 8150698 | SNAI2    | 1.2282 | 2.342745 | 4.79E-04 |
| 7978407 | PRKD1    | 1.2094 | 2.312414 | 2.45E-02 |
| 7908072 | LAMC2    | 1.201  | 2.29899  | 1.85E-03 |
| 8150881 | PLAG1    | 1.1972 | 2.292942 | 3.34E-02 |
| 8142981 | PODXL    | 1.1907 | 2.282635 | 5.81E-04 |
| 8035304 | BST2     | 1.1906 | 2.282476 | 2.98E-02 |
| 8170580 | CSAG3    | 1.1855 | 2.274422 | 2.79E-03 |
| 8140955 | CDK6     | 1.1836 | 2.271429 | 1.09E-04 |
| 8020973 | FHOD3    | 1.1717 | 2.25277  | 3.41E-03 |
| 8095728 | EREG     | 1.1699 | 2.249961 | 5.39E-05 |
| 8094789 | LIMCH1   | 1.1609 | 2.235969 | 1.54E-03 |
| 7932985 | NRP1     | 1.1593 | 2.23349  | 1.57E-03 |
| 7934979 | ANKRD1   | 1.1553 | 2.227306 | 5.55E-04 |
| 7953321 | LTBR     | 1.1546 | 2.226226 | 6.99E-03 |
| 8055688 | RND3     | 1.1517 | 2.221755 | 1.31E-03 |
| 7956867 | HMGA2    | 1.1514 | 2.221293 | 3.59E-04 |
| 8088776 | FOXP1    | 1.1466 | 2.213915 | 4.11E-04 |
| 7957298 | NAV3     | 1.1397 | 2.203352 | 2.48E-03 |
| 7985147 | DNAJA4   | 1.1346 | 2.195577 | 3.80E-03 |
| 7951372 | CASP4    | 1.1288 | 2.186768 | 1.03E-03 |
| 8018754 | CYGB     | 1.1249 | 2.180864 | 4.85E-03 |
| 8099591 | RN5S157  | 1.1248 | 2.180713 | 1.15E-02 |
| 8099633 | PPARGC1A | 1.1236 | 2.1789   | 1.42E-04 |
| 7969665 | HS6ST3   | 1.1213 | 2.175429 | 1.11E-03 |
| 8060997 | SPTLC3   | 1.1209 | 2.174826 | 2.57E-03 |
| 8007100 | IGFBP4   | 1.1205 | 2.174223 | 1.70E-05 |

RAF1-MEK1-ERK/AKT axis and NSCLC cell lines resistance to erlotinib

|         |             |        |          |          |
|---------|-------------|--------|----------|----------|
| 8093332 | ZNF876P     | 1.1194 | 2.172566 | 2.02E-02 |
| 8113130 | MCTP1       | 1.1192 | 2.172265 | 1.24E-02 |
| 7957338 | SYT1        | 1.1183 | 2.17091  | 5.02E-05 |
| 8079217 | ZNF35       | 1.1158 | 2.167151 | 1.62E-02 |
| 7939341 | CD44        | 1.113  | 2.16295  | 9.63E-04 |
| 8081590 | PHLDB2      | 1.1106 | 2.159354 | 1.84E-03 |
| 8047487 | FZD7        | 1.1083 | 2.155915 | 2.94E-04 |
| 8052872 | TGFA        | 1.1078 | 2.155167 | 4.15E-03 |
| 8166747 | SYTL5       | 1.1063 | 2.152928 | 1.79E-03 |
| 8037079 | ATP1A3      | 1.1043 | 2.149945 | 2.44E-04 |
| 7908409 | RGS2        | 1.1036 | 2.148902 | 8.83E-05 |
| 8065071 | FLRT3       | 1.1032 | 2.148307 | 3.35E-03 |
| 8045499 | HNMT        | 1.097  | 2.139094 | 1.30E-03 |
| 7917754 | BCAR3       | 1.0921 | 2.131841 | 8.69E-04 |
| 8039075 | VN1R4       | 1.0881 | 2.125939 | 1.83E-02 |
| 8085797 | THRB        | 1.0879 | 2.125644 | 4.55E-03 |
| 8013329 | SNORD3D     | 1.0859 | 2.122699 | 4.37E-04 |
| 8013325 | SNORD3B-2   | 1.0856 | 2.122258 | 4.39E-04 |
| 8013323 | SNORD3B-1   | 1.0855 | 2.122111 | 4.38E-04 |
| 8005553 | SNORD3B-2   | 1.0852 | 2.12167  | 4.38E-04 |
| 8005547 | SNORD3D     | 1.0851 | 2.121523 | 4.38E-04 |
| 7905329 | MLLT11      | 1.0827 | 2.117996 | 6.21E-04 |
| 8083594 | PTX3        | 1.0809 | 2.115355 | 5.25E-03 |
| 7917944 | MIR137      | 1.0715 | 2.101617 | 3.86E-02 |
| 8051864 | LOC728819   | 1.0669 | 2.094927 | 1.48E-02 |
| 8108447 | CXXC5       | 1.0662 | 2.093911 | 2.25E-04 |
| 8045674 | LYPD6       | 1.0646 | 2.09159  | 1.99E-02 |
| 8172043 | SRPX        | 1.0625 | 2.088548 | 5.92E-05 |
| 8059413 | DOCK10      | 1.0512 | 2.072253 | 2.50E-02 |
| 7990555 | NRG4        | 1.0492 | 2.069382 | 3.64E-05 |
| 8138741 | HOXA6       | 1.0473 | 2.066658 | 1.84E-03 |
| 7973974 | PAX9        | 1.0471 | 2.066372 | 1.50E-03 |
| 8069269 | COL6A1      | 1.0467 | 2.065799 | 8.71E-04 |
| 8102342 | ELOVL6      | 1.0421 | 2.059223 | 4.41E-04 |
| 7914342 | FABP3       | 1.0405 | 2.05694  | 2.91E-03 |
| 8081564 | CD96        | 1.0399 | 2.056085 | 3.72E-03 |
| 7986293 | MCTP2       | 1.0396 | 2.055658 | 3.32E-04 |
| 7930498 | ACSL5       | 1.0349 | 2.048972 | 1.59E-02 |
| 7950899 | RAB38       | 1.032  | 2.044857 | 1.93E-03 |
| 8029006 | AXL         | 1.0302 | 2.042307 | 2.45E-03 |
| 7962000 | PTHLH       | 1.0294 | 2.041175 | 3.87E-03 |
| 8091972 | MECOM       | 1.0256 | 2.035806 | 2.39E-03 |
| 8068633 | B3GALT5     | 1.0207 | 2.028903 | 1.33E-02 |
| 8054479 | MALL        | 1.0158 | 2.022024 | 1.93E-03 |
| 7929711 | GOLGA7B     | 1.0138 | 2.019223 | 4.00E-02 |
| 8150988 | ASPH        | 1.0134 | 2.018663 | 1.28E-04 |
| 8059580 | DNER        | 1.0113 | 2.015727 | 2.58E-03 |
| 7982000 | SNORD116-26 | 1.0095 | 2.013213 | 1.48E-02 |
| 7899627 | TINAGL1     | 1.007  | 2.009728 | 2.81E-03 |

RAF1-MEK1-ERK/AKT axis and NSCLC cell lines resistance to erlotinib

|         |           |         |          |          |
|---------|-----------|---------|----------|----------|
| 8162216 | SHC3      | 1.0051  | 2.007083 | 6.91E-04 |
| 7930980 | PPAPDC1A  | 1.0029  | 2.004024 | 2.44E-03 |
| 8145977 | PLEKHA2   | 1.0026  | 2.003608 | 3.74E-04 |
| 8117422 | HIST1H4F  | -1.0015 | 0.49948  | 1.15E-02 |
| 8105908 | OCLN      | -1.0033 | 0.498858 | 5.86E-04 |
| 8142471 | WNT2      | -1.0089 | 0.496925 | 1.18E-02 |
| 7976836 | MIR495    | -1.0104 | 0.496409 | 3.85E-02 |
| 8048026 | CPS1      | -1.0164 | 0.494348 | 3.94E-03 |
| 8155864 | RORB      | -1.0183 | 0.493698 | 3.87E-04 |
| 7928994 | LIPK      | -1.0261 | 0.491036 | 5.76E-06 |
| 8148317 | MYC       | -1.0329 | 0.488727 | 4.49E-04 |
| 8163896 | STOM      | -1.0362 | 0.48761  | 1.21E-03 |
| 8091715 | LXN       | -1.0482 | 0.483571 | 9.21E-05 |
| 8140579 | CACNA2D1  | -1.049  | 0.483303 | 4.78E-05 |
| 8054297 | CHST10    | -1.05   | 0.482968 | 1.17E-02 |
| 8108378 | CTNNA1    | -1.0562 | 0.480897 | 2.09E-04 |
| 8081758 | GRAMD1C   | -1.0567 | 0.48073  | 1.34E-02 |
| 7918768 | DENND2C   | -1.0692 | 0.476583 | 4.45E-03 |
| 8075390 | SEC14L4   | -1.0693 | 0.47655  | 1.44E-02 |
| 8111255 | CDH10     | -1.0699 | 0.476352 | 4.77E-05 |
| 8005603 | SLC47A1   | -1.0746 | 0.474803 | 8.13E-03 |
| 7961215 | STYK1     | -1.0767 | 0.474112 | 1.33E-03 |
| 7932765 | MPP7      | -1.0818 | 0.472439 | 2.05E-03 |
| 8051583 | CYP1B1    | -1.083  | 0.472046 | 5.76E-04 |
| 7976073 | FLRT2     | -1.0866 | 0.47087  | 9.05E-03 |
| 7958200 | EID3      | -1.0872 | 0.470674 | 1.53E-03 |
| 8149825 | STC1      | -1.0901 | 0.469729 | 8.66E-05 |
| 7956878 | IRAK3     | -1.0902 | 0.469696 | 3.86E-04 |
| 8109938 | RANBP17   | -1.0906 | 0.469566 | 7.07E-03 |
| 8124534 | HIST1H4L  | -1.0915 | 0.469273 | 1.10E-03 |
| 8113103 | KIAA0825  | -1.0953 | 0.468039 | 5.35E-03 |
| 8075142 | TTC28     | -1.0954 | 0.468006 | 3.73E-04 |
| 7917276 | LPAR3     | -1.0977 | 0.467261 | 6.27E-03 |
| 8022692 | DSC3      | -1.1087 | 0.463712 | 2.36E-02 |
| 8149835 | NEFL      | -1.109  | 0.463615 | 7.53E-03 |
| 8076094 | DMC1      | -1.1096 | 0.463423 | 5.44E-03 |
| 8151931 | TSPYL5    | -1.1214 | 0.459648 | 2.55E-04 |
| 7960947 | A2M       | -1.1241 | 0.458788 | 1.19E-03 |
| 7964834 | CPM       | -1.1278 | 0.457613 | 8.36E-03 |
| 8036309 | ZFP82     | -1.1313 | 0.456504 | 2.18E-03 |
| 8174654 | KLHL13    | -1.1338 | 0.455714 | 1.28E-03 |
| 8091515 | GPR87     | -1.1345 | 0.455493 | 2.22E-02 |
| 8020164 | GNAL      | -1.136  | 0.455019 | 2.87E-04 |
| 7901460 | GPX7      | -1.1453 | 0.452096 | 1.28E-03 |
| 8062873 | KCNK15    | -1.1475 | 0.451407 | 2.58E-03 |
| 8169249 | MID2      | -1.1547 | 0.44916  | 1.42E-03 |
| 8066431 | ADA       | -1.1648 | 0.446026 | 1.88E-03 |
| 8111203 | LOC285696 | -1.1649 | 0.445995 | 4.09E-03 |
| 7954293 | PDE3A     | -1.1661 | 0.445624 | 5.28E-04 |

RAF1-MEK1-ERK/AKT axis and NSCLC cell lines resistance to erlotinib

|         |            |         |          |          |
|---------|------------|---------|----------|----------|
| 7991070 | HDGFRP3    | -1.1694 | 0.444606 | 5.28E-03 |
| 8173299 | EDA2R      | -1.1779 | 0.441994 | 2.92E-03 |
| 8149574 | CSGALNACT1 | -1.1783 | 0.441872 | 1.00E-03 |
| 8147796 | RIMS2      | -1.1855 | 0.439672 | 7.77E-03 |
| 7984704 | NEO1       | -1.1885 | 0.438759 | 4.62E-04 |
| 8108713 | PCDHB8     | -1.1963 | 0.436393 | 1.04E-02 |
| 8051298 | GALNT14    | -1.2016 | 0.434793 | 1.24E-03 |
| 8123920 | ELOVL2     | -1.2032 | 0.434311 | 5.90E-03 |
| 8068100 | LINC00189  | -1.2042 | 0.43401  | 8.27E-03 |
| 8011713 | CXCL16     | -1.205  | 0.433769 | 2.78E-02 |
| 8114354 | NME5       | -1.2056 | 0.433589 | 6.84E-03 |
| 7944803 | VWA5A      | -1.2078 | 0.432928 | 2.01E-04 |
| 8063458 | DOK5       | -1.208  | 0.432868 | 1.04E-03 |
| 8039054 | ZNF347     | -1.2092 | 0.432508 | 1.55E-03 |
| 8024712 | ATCAY      | -1.2102 | 0.432209 | 9.25E-04 |
| 8133728 | ZP3        | -1.2115 | 0.431819 | 3.18E-02 |
| 7898916 | GRHL3      | -1.2132 | 0.431311 | 2.61E-04 |
| 8081219 | ST3GAL6    | -1.2151 | 0.430743 | 3.74E-04 |
| 8073766 | RIBC2      | -1.2154 | 0.430654 | 1.38E-03 |
| 8107673 | GRAMD3     | -1.2192 | 0.429521 | 3.29E-04 |
| 8135661 | CFTR       | -1.2237 | 0.428183 | 2.49E-04 |
| 8022176 | LAMA1      | -1.2313 | 0.425933 | 1.94E-03 |
| 8113358 | ST8SIA4    | -1.2335 | 0.425284 | 3.14E-03 |
| 8089015 | PROS1      | -1.2447 | 0.421996 | 6.01E-03 |
| 8047788 | ADAM23     | -1.2581 | 0.418094 | 1.91E-03 |
| 8015412 | JUP        | -1.2591 | 0.417805 | 7.82E-04 |
| 8020384 | GREB1L     | -1.2615 | 0.41711  | 1.20E-02 |
| 8055952 | NR4A2      | -1.2634 | 0.416561 | 1.03E-04 |
| 8014248 | SLFN13     | -1.2668 | 0.415581 | 2.93E-03 |
| 8146738 | MCMDC2     | -1.275  | 0.413225 | 2.31E-03 |
| 8128553 | BVES       | -1.2751 | 0.413197 | 4.77E-03 |
| 8144742 | EFHA2      | -1.2792 | 0.412024 | 1.18E-03 |
| 8072229 | NEFH       | -1.2854 | 0.410257 | 3.44E-03 |
| 8121749 | GJA1       | -1.2879 | 0.409547 | 5.40E-04 |
| 8100870 | ADAMTS3    | -1.2897 | 0.409036 | 6.00E-03 |
| 7961440 | PLBD1      | -1.294  | 0.407819 | 1.77E-03 |
| 8096050 | FGF5       | -1.2985 | 0.406549 | 7.77E-04 |
| 8117045 | RBM24      | -1.301  | 0.405845 | 1.03E-03 |
| 8052399 | BCL11A     | -1.3066 | 0.404273 | 4.09E-03 |
| 8100338 | ERVMER34-1 | -1.3067 | 0.404244 | 3.09E-03 |
| 8116874 | SYCP2L     | -1.3186 | 0.400924 | 3.84E-03 |
| 8149927 | CLU        | -1.3291 | 0.398016 | 2.58E-04 |
| 8174598 | IL13RA2    | -1.3321 | 0.39719  | 7.62E-04 |
| 8141094 | PDK4       | -1.333  | 0.396942 | 8.05E-04 |
| 8096061 | C4orf22    | -1.3442 | 0.393872 | 2.38E-03 |
| 8099760 | ARAP2      | -1.3519 | 0.391776 | 2.42E-03 |
| 8104107 | TRIML2     | -1.3579 | 0.39015  | 2.14E-03 |
| 8122240 | RN5S219    | -1.3612 | 0.389258 | 5.57E-03 |
| 8173059 | WNK3       | -1.3673 | 0.387616 | 2.97E-03 |

RAF1-MEK1-ERK/AKT axis and NSCLC cell lines resistance to erlotinib

|         |          |         |          |          |
|---------|----------|---------|----------|----------|
| 8169186 | TBC1D8B  | -1.3733 | 0.386007 | 1.01E-02 |
| 8051762 | SLC8A1   | -1.3822 | 0.383633 | 4.46E-04 |
| 7965231 | MGAT4C   | -1.3823 | 0.383607 | 7.20E-03 |
| 7983478 | C15orf48 | -1.4026 | 0.378247 | 1.02E-02 |
| 8054135 | MGAT4A   | -1.4041 | 0.377854 | 5.10E-03 |
| 8175234 | GPC3     | -1.4092 | 0.37652  | 1.22E-03 |
| 8123315 | QKI      | -1.4101 | 0.376286 | 1.71E-02 |
| 8014233 | SLFN11   | -1.4146 | 0.375114 | 1.42E-03 |
| 8122150 | EYA4     | -1.4178 | 0.374283 | 3.42E-03 |
| 8111569 | RANBP3L  | -1.424  | 0.372678 | 2.79E-03 |
| 8031398 | NLRP2    | -1.427  | 0.371903 | 3.90E-03 |
| 7971077 | POSTN    | -1.4323 | 0.37054  | 7.70E-03 |
| 7901497 | ZYG11A   | -1.4335 | 0.370232 | 1.32E-02 |
| 7901720 | PRKAA2   | -1.4367 | 0.369411 | 1.04E-04 |
| 8127767 | ELOVL4   | -1.443  | 0.367802 | 1.10E-02 |
| 8123864 | TFAP2A   | -1.4518 | 0.365565 | 1.35E-03 |
| 8141066 | PON3     | -1.4522 | 0.365464 | 1.98E-03 |
| 8092169 | TNFSF10  | -1.4559 | 0.364528 | 1.63E-03 |
| 8098856 | RNF212   | -1.4599 | 0.363518 | 2.12E-04 |
| 8054281 | LONRF2   | -1.4684 | 0.361383 | 3.76E-04 |
| 8092251 | GNB4     | -1.4732 | 0.360183 | 1.68E-02 |
| 8056323 | FIGN     | -1.4817 | 0.358067 | 1.32E-03 |
| 8006433 | CCL2     | -1.4818 | 0.358042 | 2.66E-04 |
| 7943413 | BIRC3    | -1.483  | 0.357744 | 5.40E-04 |
| 8151341 | TRPA1    | -1.4885 | 0.356383 | 3.79E-03 |
| 8112007 | EMB      | -1.4991 | 0.353774 | 2.81E-03 |
| 8142079 | EFCAB10  | -1.5014 | 0.35321  | 5.91E-03 |
| 8083616 | MLF1     | -1.5048 | 0.352379 | 2.30E-02 |
| 8035813 | ZNF43    | -1.5054 | 0.352233 | 6.57E-03 |
| 7907222 | PRRX1    | -1.5115 | 0.350746 | 1.45E-04 |
| 8070632 | CBS      | -1.5179 | 0.349194 | 6.80E-04 |
| 7988414 | GATM     | -1.5273 | 0.346926 | 4.38E-03 |
| 7932453 | NEBL     | -1.5448 | 0.342743 | 2.54E-04 |
| 8094751 | CHRNA9   | -1.5464 | 0.342363 | 1.91E-03 |
| 8166314 | PPEF1    | -1.5553 | 0.340258 | 1.58E-03 |
| 8167701 | XAGE1B   | -1.5561 | 0.340069 | 1.19E-03 |
| 8167710 | XAGE1A   | -1.5562 | 0.340046 | 1.19E-03 |
| 8172757 | XAGE1E   | -1.5565 | 0.339975 | 1.19E-03 |
| 8083743 | ARL14    | -1.5684 | 0.337182 | 1.60E-03 |
| 8122365 | GPR126   | -1.5892 | 0.332356 | 7.32E-04 |
| 8104601 | BASP1    | -1.6077 | 0.328121 | 8.28E-04 |
| 8076704 | SMC1B    | -1.6131 | 0.326895 | 1.79E-05 |
| 8108697 | PCDHB5   | -1.6174 | 0.325922 | 9.23E-03 |
| 7910030 | DNAH14   | -1.636  | 0.321747 | 7.91E-03 |
| 8080847 | C3orf14  | -1.6458 | 0.319569 | 4.96E-04 |
| 8031632 | ZNF542   | -1.655  | 0.317538 | 6.00E-04 |
| 8022711 | DSC2     | -1.666  | 0.315126 | 6.67E-04 |
| 8083968 | NLGN1    | -1.6713 | 0.31397  | 1.14E-02 |
| 8056611 | LRP2     | -1.6966 | 0.308512 | 2.17E-03 |

RAF1-MEK1-ERK/AKT axis and NSCLC cell lines resistance to erlotinib

|         |           |         |          |          |
|---------|-----------|---------|----------|----------|
| 8175539 | LDOC1     | -1.6995 | 0.307893 | 9.97E-04 |
| 7927827 | MYPN      | -1.7026 | 0.307232 | 4.16E-03 |
| 8144726 | TUSC3     | -1.7034 | 0.307062 | 1.29E-03 |
| 8124604 | TRNAA46P  | -1.7061 | 0.306487 | 4.80E-03 |
| 7926545 | PLXDC2    | -1.7085 | 0.305978 | 2.30E-05 |
| 8135697 | ANKRD7    | -1.727  | 0.302079 | 4.24E-04 |
| 8052355 | EFEMP1    | -1.7591 | 0.295432 | 8.81E-03 |
| 8094778 | UCHL1     | -1.7683 | 0.293554 | 9.12E-04 |
| 8052438 | LOC339803 | -1.7751 | 0.292174 | 2.08E-02 |
| 8098379 | WDR17     | -1.8297 | 0.281323 | 7.45E-04 |
| 7957452 | ALX1      | -1.8515 | 0.277104 | 7.14E-04 |
| 8150138 | TEX15     | -1.8548 | 0.276471 | 1.96E-04 |
| 8140556 | HGF       | -1.8902 | 0.26977  | 9.05E-05 |
| 8067903 | USP25     | -1.936  | 0.26134  | 9.69E-05 |
| 7934215 | SPOCK2    | -1.9485 | 0.259085 | 1.22E-04 |
| 7903227 | PALMD     | -1.9585 | 0.257296 | 3.43E-04 |
| 8007643 | C17orf104 | -1.9625 | 0.256583 | 8.34E-04 |
| 8127502 | LINC00472 | -1.9658 | 0.255997 | 4.68E-05 |
| 8113773 | ALDH7A1   | -1.9826 | 0.253033 | 8.97E-03 |
| 7937079 | BNIP3     | -1.9953 | 0.250816 | 4.94E-05 |
| 8170531 | MAGEA4    | -2.0525 | 0.241066 | 2.53E-03 |
| 7962250 | CPNE8     | -2.0745 | 0.237418 | 5.26E-03 |
| 7944769 | GRAMD1B   | -2.0779 | 0.236859 | 7.15E-04 |
| 8124531 | HIST1H3I  | -2.0804 | 0.236449 | 4.36E-04 |
| 7922994 | FAM5C     | -2.1145 | 0.230926 | 1.93E-04 |
| 8069532 | HSPA13    | -2.2188 | 0.21482  | 4.90E-04 |
| 8105040 | OSMR      | -2.2762 | 0.206441 | 1.59E-03 |
| 7957458 | NTS       | -2.4193 | 0.186947 | 1.88E-04 |
| 8067140 | CYP24A1   | -2.4803 | 0.179207 | 1.88E-05 |
| 7930208 | INA       | -2.503  | 0.176409 | 7.36E-04 |
| 8112980 | EDIL3     | -2.6215 | 0.162499 | 7.84E-04 |
| 8141016 | TFPI2     | -3.1938 | 0.109287 | 5.08E-06 |

**Supplementary Table 3.** 13 genes regulated by RAF1

| Probe ID | Genes in dataset | Prediction (based on expression direction) | Fold Change | Findings      |
|----------|------------------|--------------------------------------------|-------------|---------------|
| 7954090  | EMP1             | Activated                                  | 5.228       | Upregulates   |
| 7908388  | RGS1             | Activated                                  | 4.675       | Upregulates   |
| 8089082  | DCBLD2           | Activated                                  | 2.750       | Upregulates   |
| 7922976  | PTGS2            | Activated                                  | 2.728       | Upregulates   |
| 7934979  | ANKRD1           | Activated                                  | 2.227       | Upregulates   |
| 8055688  | RND3             | Affected                                   | 2.222       | Regulates     |
| 7956867  | HMGA2            | Activated                                  | 2.221       | Upregulates   |
| 7939341  | CD44             | Activated                                  | 2.163       | Upregulates   |
| 7962000  | PTHLH            | Activated                                  | 2.041       | Upregulates   |
| 8105908  | OCLN             | Activated                                  | -2.005      | Downregulates |
| 8148317  | MYC              | Inhibited                                  | -2.046      | Upregulates   |
| 8105040  | OSMR             | Inhibited                                  | -4.844      | Upregulates   |
| 8141016  | TFPI2            | Inhibited                                  | -9.150      | Upregulates   |
